# Supplementary material for: Synthetic data in cancer and cerebrovascular disease research: A novel approach to big data
Source: PubMed Central journal article supplement (PMC10849264; doi:10.1371/journal.pone.0295921), 2024-02-07
Supplement: pone.0295921.s001.pdf [file pone.0295921.s001.pdf]

## Supplemental Information

Number of Table: 4

**S1 Table.** Search terms utilized for identifying cancer subtypes for Cohort 1: Cancer and Ischemic Stroke cohort

- Carcinoma in situ of breast
- Carcinoma in situ of cervix uteri
- Carcinoma in situ of middle ear and respiratory system
- Carcinoma in situ of oral cavity, oesophagus and stomach
- Carcinoma in situ of other and unspecified digestive organs
- Carcinoma in situ of other and unspecified genital organs
- Carcinoma in situ of other and unspecified sites
- Malignant immunoproliferative diseases
- Malignant neoplasm of accessory sinuses
- Malignant neoplasm of adrenal gland
- Malignant neoplasm of anus and anal canal
- Malignant neoplasm of base of tongue
- Malignant neoplasm of bladder
- Malignant neoplasm of bone and articular cartilage of limbs
- Malignant neoplasm of bone and articular cartilage of other and unspecified sites
- Malignant neoplasm of breast
- Malignant neoplasm of bronchus and lung
- Malignant neoplasm of cervix uteri
- Malignant neoplasm of colon
- Malignant neoplasm of corpus uteri
- Malignant neoplasm of eye and adnexa
- Malignant neoplasm of floor of mouth
- Malignant neoplasm of gallbladder
- Malignant neoplasm of gum
- Malignant neoplasm of heart, mediastinum and pleura
- Malignant neoplasm of hypopharynx
- Malignant neoplasm of kidney, except renal pelvis
- Malignant neoplasm of larynx
- Malignant neoplasm of lip
- Malignant neoplasm of liver and intrahepatic bile ducts
- Malignant neoplasm of nasal cavity and middle ear
- Malignant neoplasm of nasopharynx
- Malignant neoplasm of oesophagus
- Malignant neoplasm of oropharynx
- Malignant neoplasm of other and ill-defined digestive organs
- Malignant neoplasm of other and ill-defined sites
- Malignant neoplasm of other and ill-defined sites in the lip, oral cavity and pharynx
- Malignant neoplasm of other and ill-defined sites in the respiratory system and intrathoracic organs

- Malignant neoplasm of other and unspecified female genital organs
- Malignant neoplasm of other and unspecified major salivary glands
- Malignant neoplasm of other and unspecified male genital organs
- Malignant neoplasm of other and unspecified parts of biliary tract
- Malignant neoplasm of other and unspecified parts of mouth
- Malignant neoplasm of other and unspecified parts of tongue
- Malignant neoplasm of other and unspecified urinary organs
- Malignant neoplasm of other connective and soft tissue
- Malignant neoplasm of other endocrine glands and related structures
- Malignant neoplasm of ovary
- Malignant neoplasm of palate
- Malignant neoplasm of pancreas
- Malignant neoplasm of parotid gland
- Malignant neoplasm of penis
- Malignant neoplasm of peripheral nerves and autonomic nervous system
- Malignant neoplasm of placenta
- Malignant neoplasm of prostate
- Malignant neoplasm of pyriform sinus
- Malignant neoplasm of rectosigmoid junction
- Malignant neoplasm of rectum
- Malignant neoplasm of renal pelvis
- Malignant neoplasm of retroperitoneum and peritoneum
- Malignant neoplasm of small intestine
- Malignant neoplasm of stomach
- Malignant neoplasm of testis
- Malignant neoplasm of thymus
- Malignant neoplasm of thyroid gland
- Malignant neoplasm of tonsil
- Malignant neoplasm of trachea
- Malignant neoplasm of ureter
- Malignant neoplasm of uterus, part unspecified
- Malignant neoplasm of vagina
- Malignant neoplasm of vulva
- Malignant neoplasm without specification of site
- Malignant neoplasms of independent (primary) multiple sites
- Multiple myeloma and malignant plasma cell neoplasms
- Other and unspecified malignant neoplasms of lymphoid, haematopoietic and related tissue
- Secondary and unspecified malignant neoplasm of lymph nodes
- Secondary malignant neoplasm of other and unspecified sites
- Secondary malignant neoplasm of respiratory and digestive organs

**S2 Table.** Distribution of the types of cancer in synthetic cohort #1: ischemic stroke patients with cancer

| <b>Cancer Type</b>          | <b>Frequency</b> | <b>Percentage</b> |
|-----------------------------|------------------|-------------------|
| Lung                        | 242              | 18.98%            |
| Secondary malignancies      | 183              | 14.35%            |
| Colorectal                  | 152              | 11.92%            |
| Bladder                     | 95               | 7.45%             |
| Immunoproliferative disease | 87               | 6.82%             |
| Censored                    | 80               | 6.27%             |
| Unspecified                 | 79               | 6.20%             |
| Prostate                    | 78               | 6.12%             |
| Esophageal + upper GI       | 56               | 4.39%             |
| Breast                      | 49               | 3.84%             |
| Pancreatic                  | 43               | 3.37%             |
| Urogynecologic              | 38               | 2.98%             |
| Kidney                      | 30               | 2.35%             |
| Head and neck cancer        | 22               | 1.73%             |
| Bone and cartilage          | 18               | 1.41%             |
| Hepatobiliary               | 14               | 1.10%             |
| Melanoma                    | 9                | 0.71%             |

**S3 Table.** List of codes used to select patients with ischemic stroke using the International Classification of Diseases (ICD) 10<sup>th</sup> revision.

|                        | <b>ICD-10 coding</b>                                                                                                                                                                                                                                                                                          |
|------------------------|---------------------------------------------------------------------------------------------------------------------------------------------------------------------------------------------------------------------------------------------------------------------------------------------------------------|
| <b>Ischemic Stroke</b> | I63.00, I63.01x, I63.02, I63.03x, I63.09, I63.10, I63.11x, I63.12, I63.13x, I63.19, I63.20, I63.21x, I63.22, I63.23x, I63.29, I63.30, I63.31x, I63.32x, I63.33x, I63.34x, I63.39, I63.40, I63.41x, I63.42x, I63.43x, I63.44x, I63.49, I63.50, I63.51x, I63.52x, I63.53x, I63.54x, I63.59, I63.6, I63.8, I63.9 |

**S4 Table.** Inflation-adjusted median costs per year for the cancer and stroke (A) and no cancer and stroke cohorts (B)

| <b>YEAR</b>  | <b>ORIGINAL<br/>MEDIAN<br/>VALUES</b> | <b>INFLATION-<br/>ADJUSTED<br/>MEDIAN<br/>EQUIVALENT<br/>(2022)</b> | <b>ORIGINAL<br/>MEAN<br/>VALUES</b> | <b>INFLATION-<br/>ADJUSTED<br/>MEAN<br/>EQUIVALENT<br/>(2022)</b> |
|--------------|---------------------------------------|---------------------------------------------------------------------|-------------------------------------|-------------------------------------------------------------------|
| <b>2005</b>  | \$7,505.24                            | \$10,605.54                                                         | \$7,505.24                          | \$10,605.54                                                       |
| <b>2006</b>  | \$8,176.14                            | \$11,331.19                                                         | \$9,436.24                          | \$13,077.53                                                       |
| <b>2007</b>  | \$5,874.77                            | \$7,966.50                                                          | \$9,587.93                          | \$13,001.74                                                       |
| <b>2008</b>  | \$6,782.39                            | \$8,964.14                                                          | \$14,693.58                         | \$19,420.19                                                       |
| <b>2009</b>  | N/A                                   | N/A                                                                 | N/A                                 | N/A                                                               |
| <b>2010</b>  | \$16,383.30                           | \$21,263.13                                                         | \$27,625.31                         | \$35,853.62                                                       |
| <b>2011</b>  | \$4,750.74                            | \$5,990.92                                                          | \$6,107.72                          | \$7,702.14                                                        |
| <b>2012</b>  | \$11,219.45                           | \$13,939.04                                                         | \$15,661.87                         | \$19,458.30                                                       |
| <b>2013</b>  | \$10,212.74                           | \$12,574.64                                                         | \$17,707.16                         | \$21,802.30                                                       |
| <b>2014</b>  | \$4,314.73                            | \$5,210.76                                                          | \$9,630.88                          | \$11,630.91                                                       |
| <b>2015</b>  | \$19,823.37                           | \$23,675.30                                                         | \$18,557.10                         | \$22,162.98                                                       |
| <b>2016</b>  | \$13,911.32                           | \$16,381.55                                                         | \$19,929.50                         | \$23,468.39                                                       |
| <b>2017</b>  | \$11,185.63                           | \$12,969.84                                                         | \$25,279.86                         | \$29,312.23                                                       |
| <b>2018</b>  | \$10,475.83                           | \$11,873.65                                                         | \$20,952.13                         | \$23,747.84                                                       |
| <b>2019</b>  | \$9,946.43                            | \$11,058.09                                                         | \$11,728.51                         | \$13,039.34                                                       |
| <b>TOTAL</b> |                                       |                                                                     | \$15,314.50                         | \$ 20,686.29                                                      |

| <b>YEAR</b> | <b>ORIGINAL<br/>MEDIAN VALUES</b> | <b>INFLATION-<br/>ADJUSTED<br/>MEDIAN<br/>EQUIVALENT<br/>(2022)</b> | <b>ORIGINAL<br/>MEAN<br/>VALUES</b> | <b>INFLATION-<br/>ADJUSTED<br/>MEAN<br/>EQUIVALENT<br/>(2022)</b> |
|-------------|-----------------------------------|---------------------------------------------------------------------|-------------------------------------|-------------------------------------------------------------------|
| <b>2005</b> | 6068.76                           | 8575.66                                                             | \$15,701.71                         | \$ 22,187.83                                                      |
| <b>2006</b> | 5467.975                          | 7577.98                                                             | \$15,865.69                         | \$ 21,988.01                                                      |
| <b>2007</b> | 10218.88                          | 13857.35                                                            | \$18,059.32                         | \$ 24,489.41                                                      |
| <b>2008</b> | 9238.21                           | 12242.04                                                            | \$16,688.15                         | \$ 22,114.36                                                      |
| <b>2009</b> | 7389.82                           | 9766.96                                                             | \$12,792.01                         | \$ 16,906.92                                                      |

|              |          |          |             |              |
|--------------|----------|----------|-------------|--------------|
| <b>2010</b>  | 10752.98 | 13955.80 | \$16,648.83 | \$ 21,607.75 |
| <b>2011</b>  | 6746.39  | 8507.541 | \$11,254.43 | \$ 14,192.41 |
| <b>2012</b>  | 8160.92  | 10139.12 | \$15,893.87 | \$ 19,746.54 |
| <b>2013</b>  | 7719.48  | 9504.77  | \$11,372.40 | \$ 14,002.50 |
| <b>2014</b>  | 8745.705 | 10561.91 | \$14,551.89 | \$ 17,573.85 |
| <b>2015</b>  | 9061.67  | 10822.47 | \$14,370.74 | \$ 17,163.16 |
| <b>2016</b>  | 8646.61  | 10181.99 | \$14,221.18 | \$ 16,746.44 |
| <b>2017</b>  | 8278.39  | 9598.87  | \$15,960.06 | \$ 18,505.83 |
| <b>2018</b>  | 6627.9   | 7512.28  | \$13,569.72 | \$ 15,380.37 |
| <b>2019</b>  | 7099.4   | 7892.86  | \$9,211.71  | \$ 10,241.25 |
| <b>TOTAL</b> |          |          | \$14,410.78 | \$17,295.31  |
